# Supplementary material for: MERRAclim, a high-resolution global dataset of remotely sensed bioclimatic variables for ecological modelling
Source: PubMed Central journal article supplement (PMC5477563; doi:10.1038/sdata.2017.78), 2017-06-20

## Supplementary Information

### Table of contents:

|                        |         |
|------------------------|---------|
| Supplementary Figure 1 | page 2  |
| Supplementary Figure 2 | page 12 |
| Supplementary Figure 3 | page 13 |
| Supplementary Figure 4 | page 14 |
| Supplementary Figure 5 | page 15 |

**Supplementary Figure 1:** Absolute difference between MERRAclim interpolated using Kriging and MERRAclim interpolated using Spline at 10 arc-minutes resolution

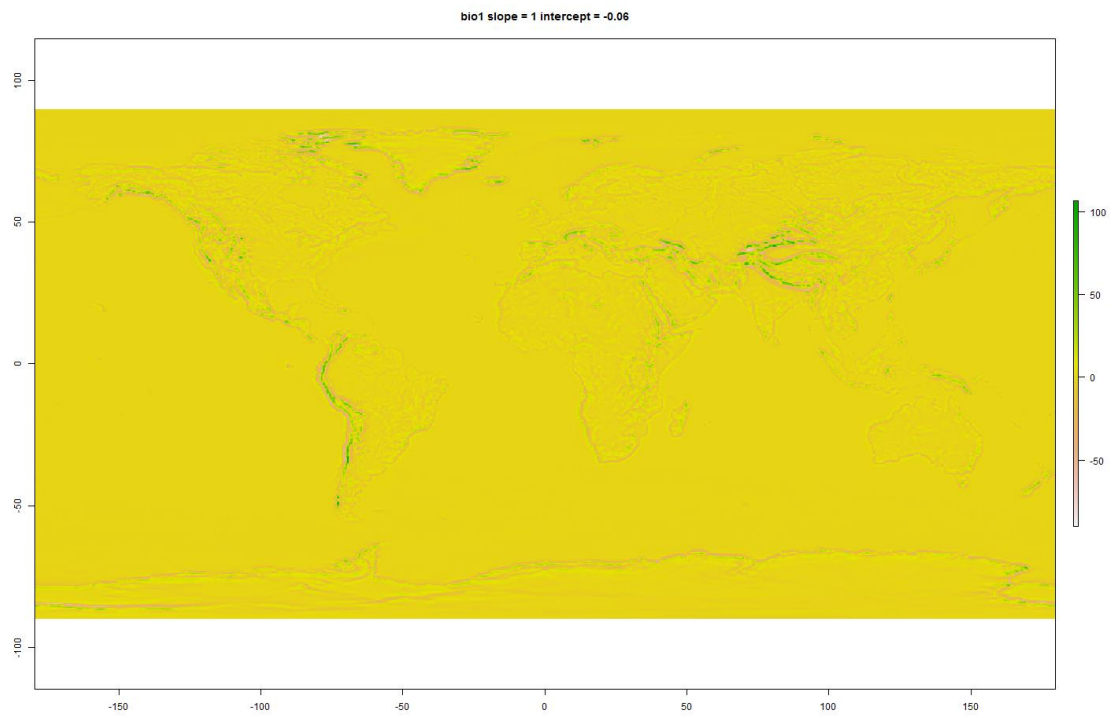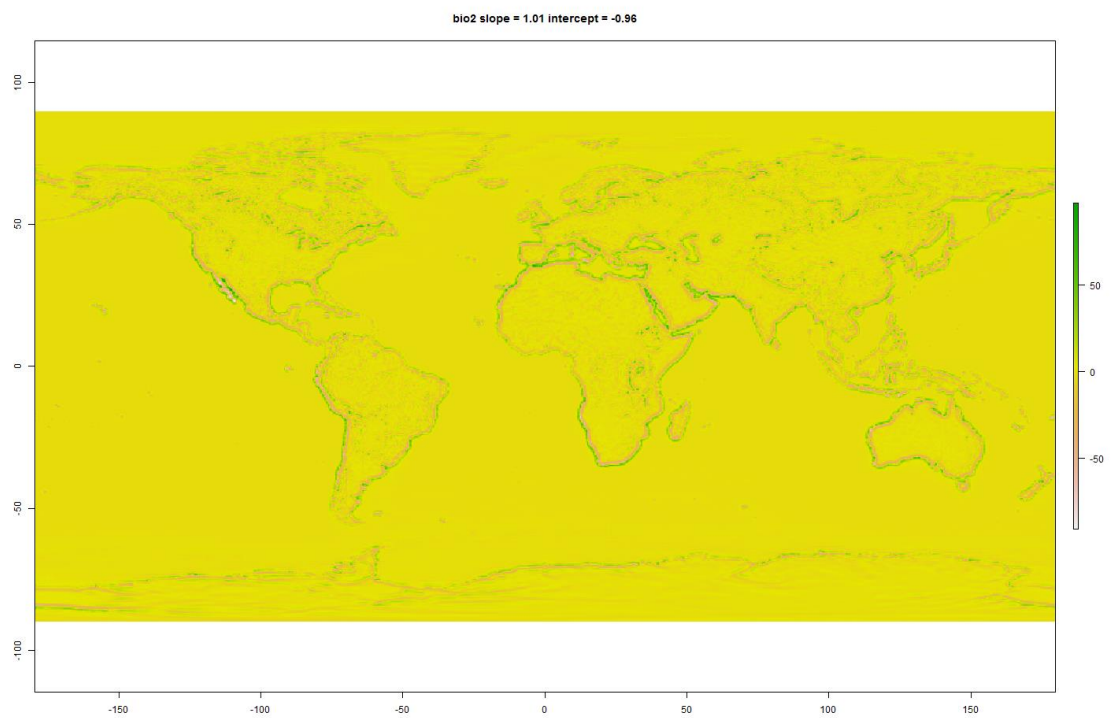

### Supplementary Figure 1 (cont.)

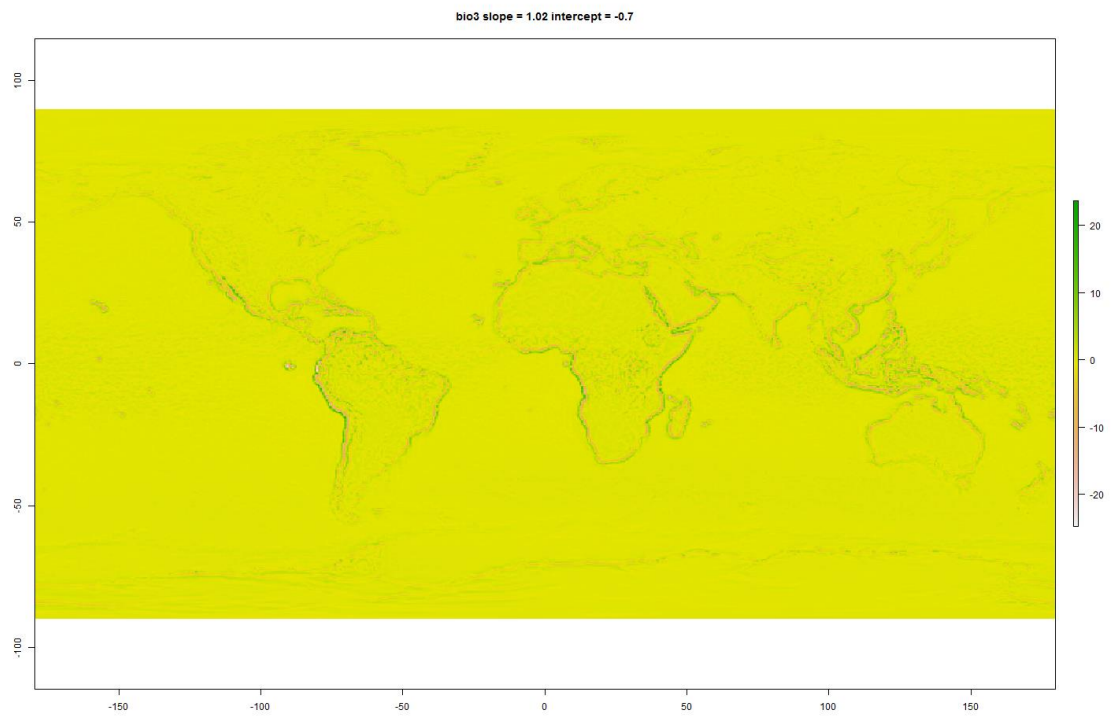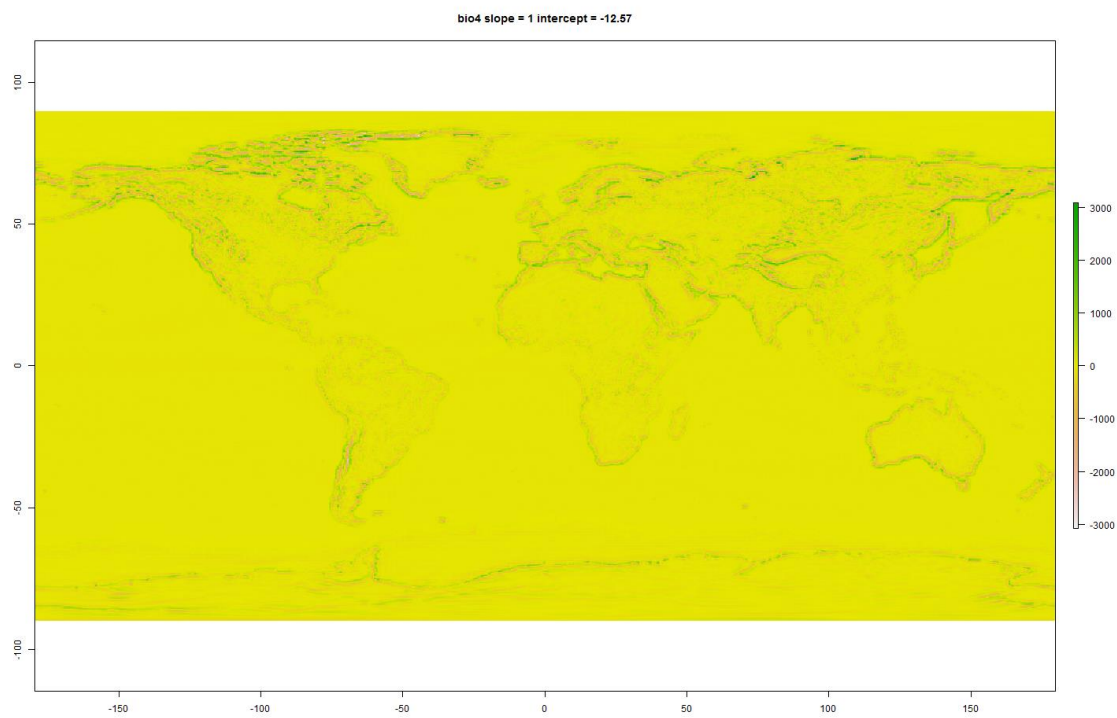

### Supplementary Figure 1 (cont.)

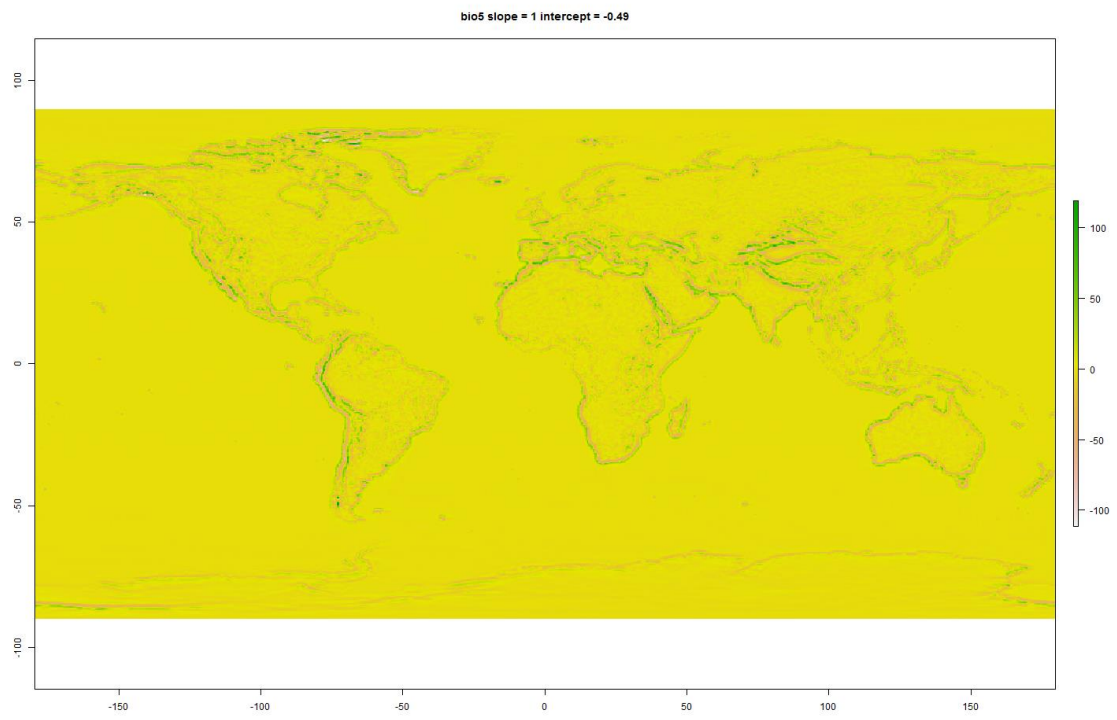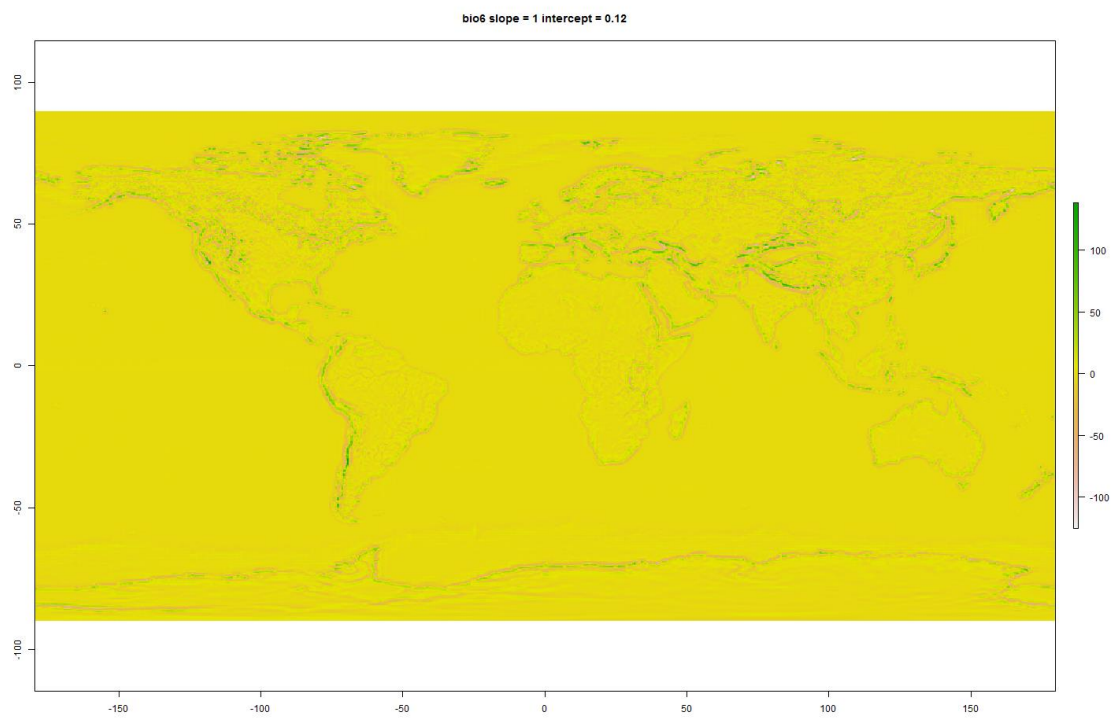

## Supplementary Figure 1 (cont.)

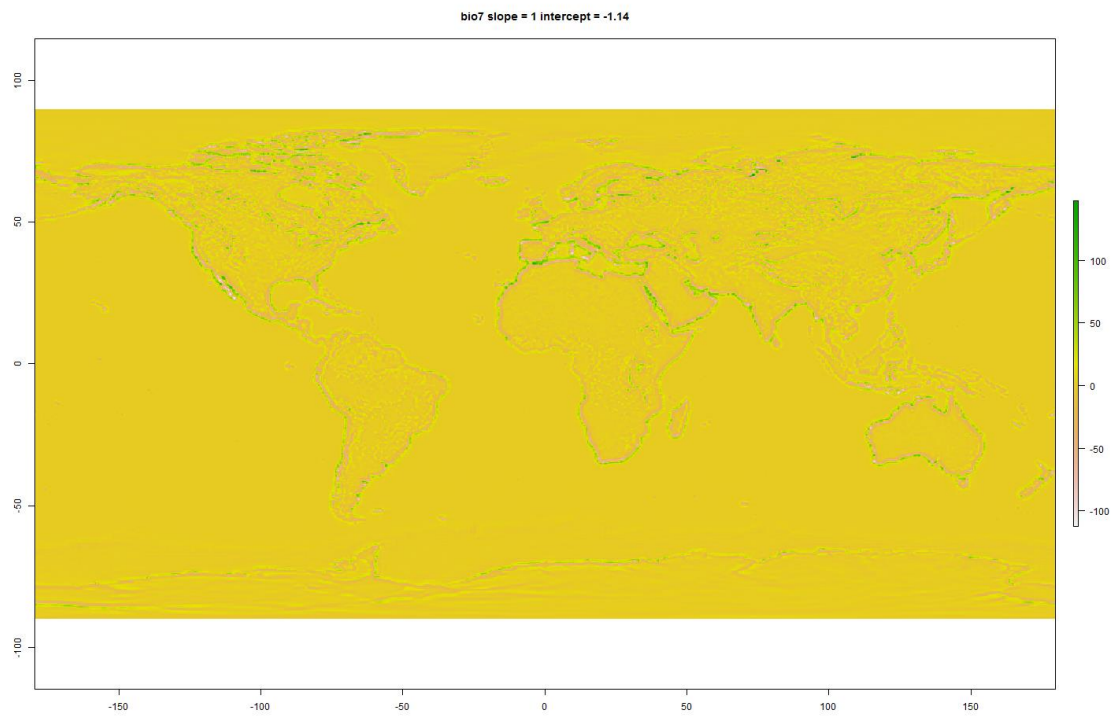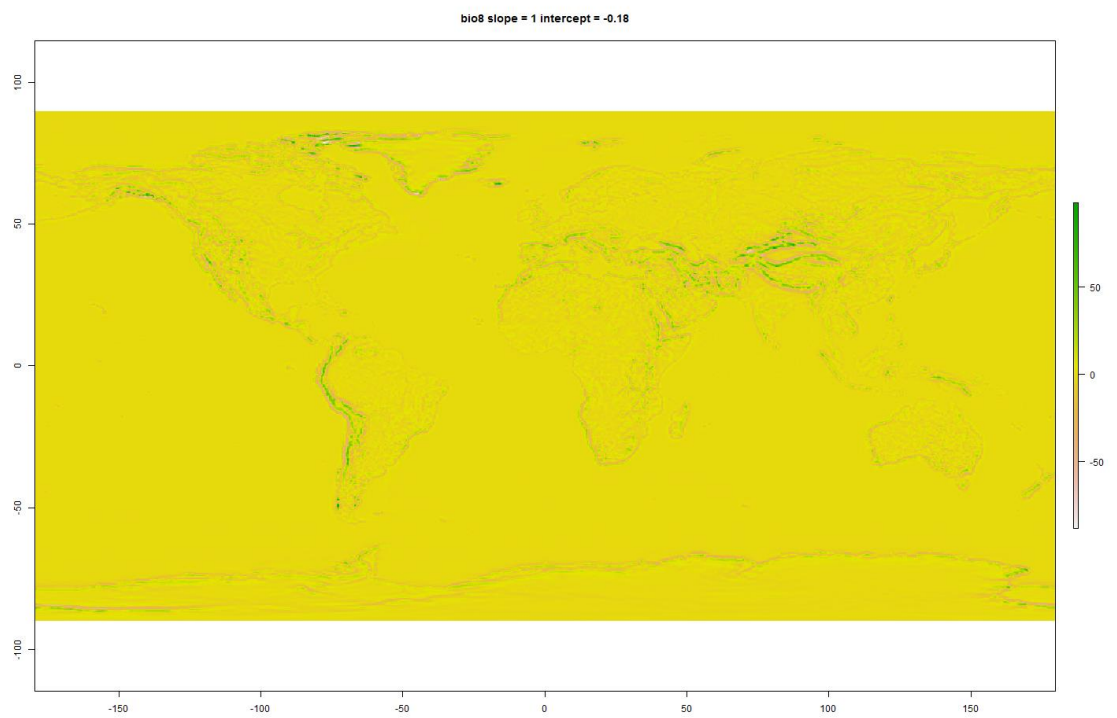

### Supplementary Figure 1 (cont.)

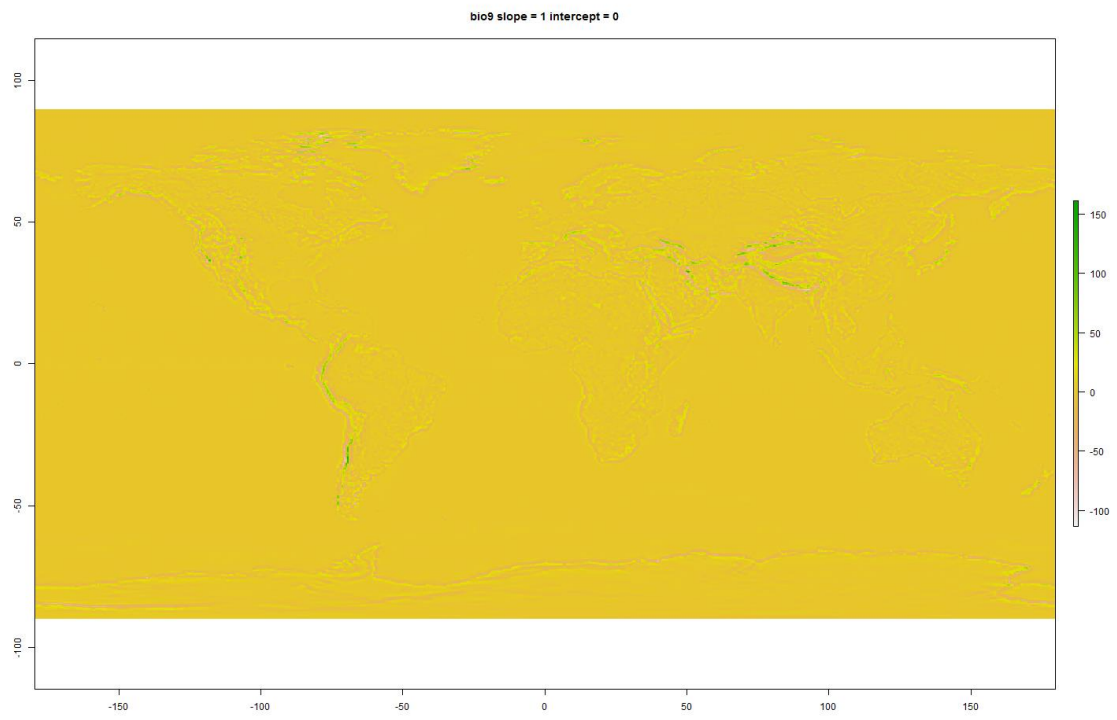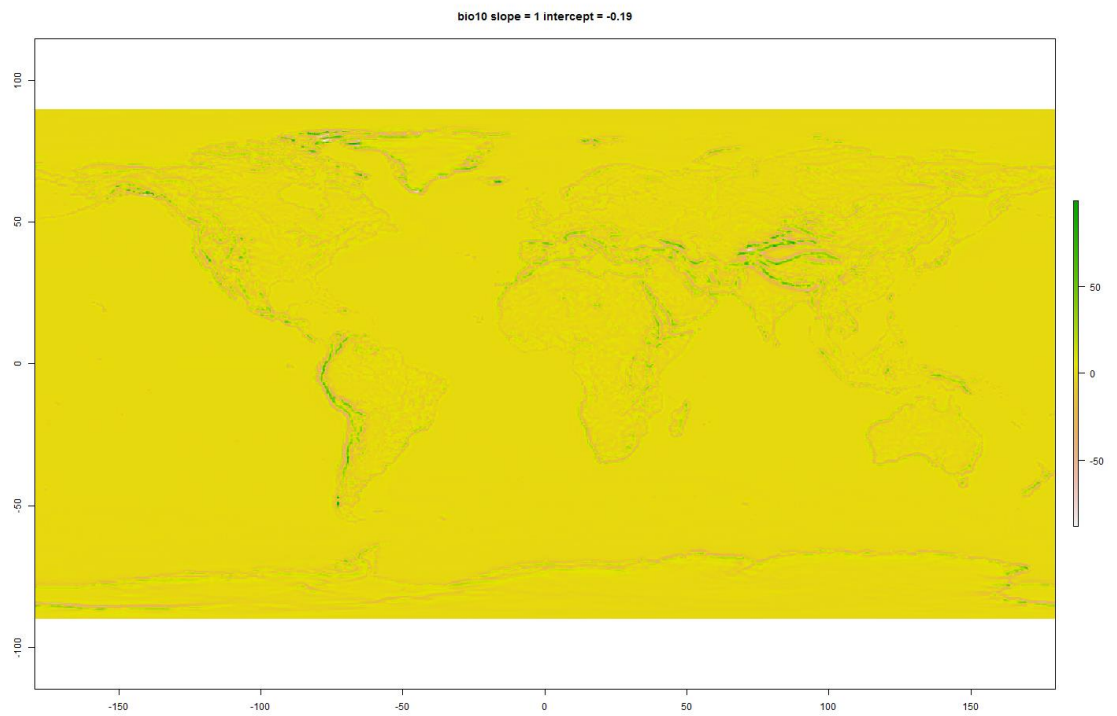



### Supplementary Figure 1 (cont.)

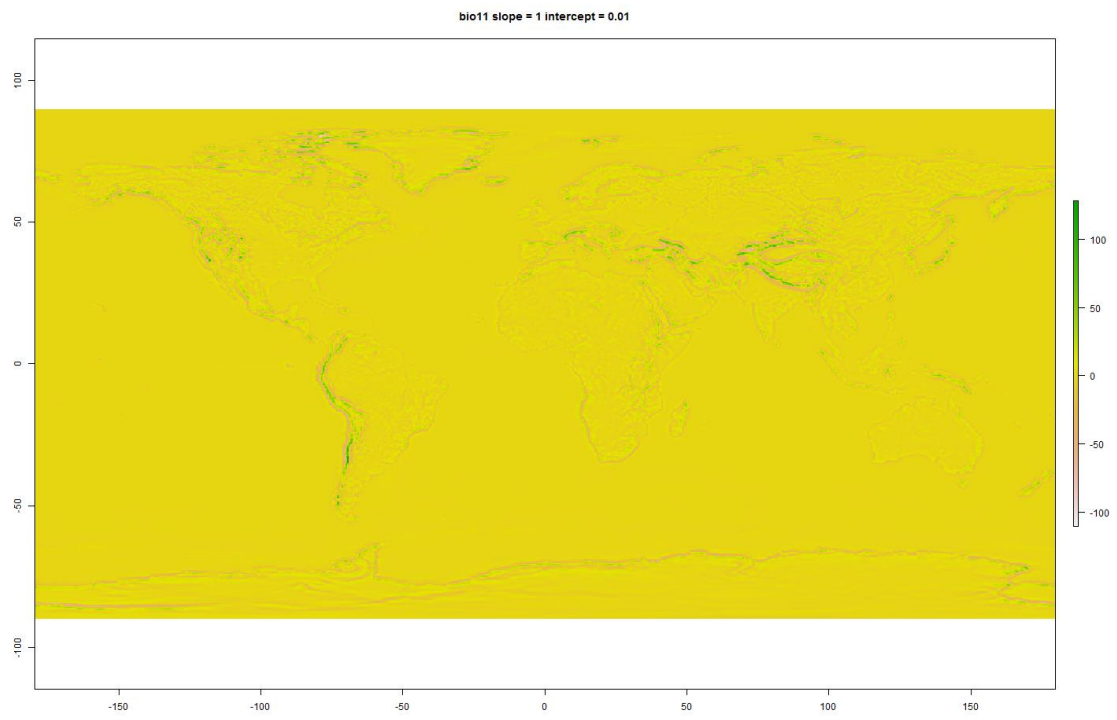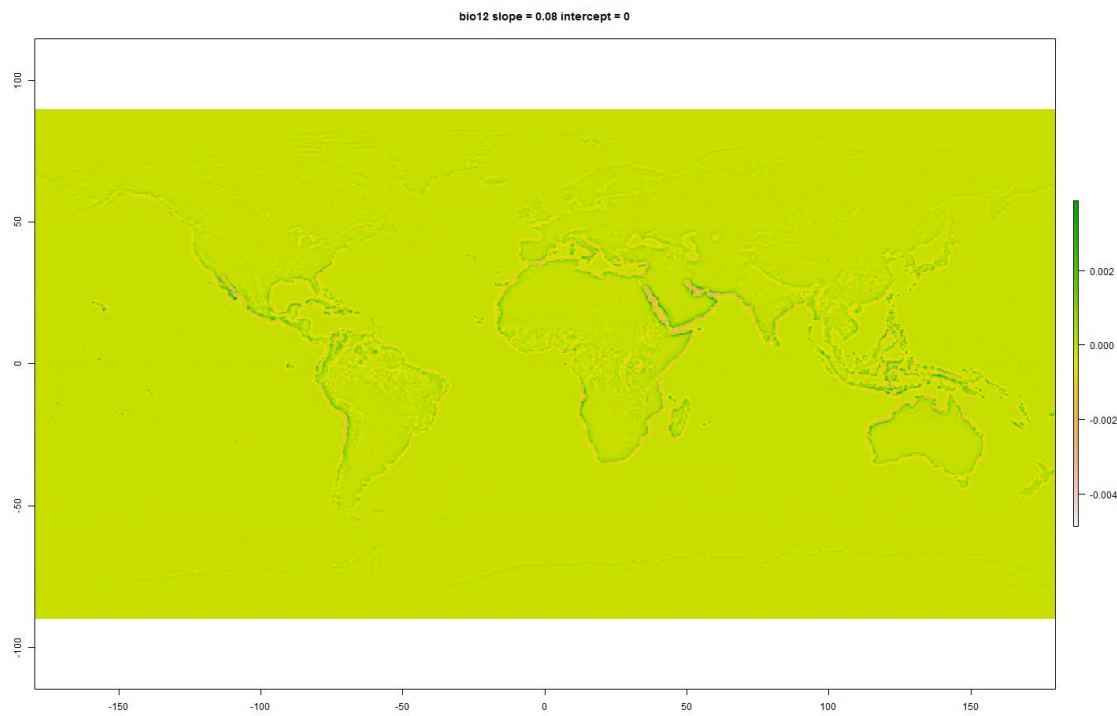

### Supplementary Figure 1 (cont.)

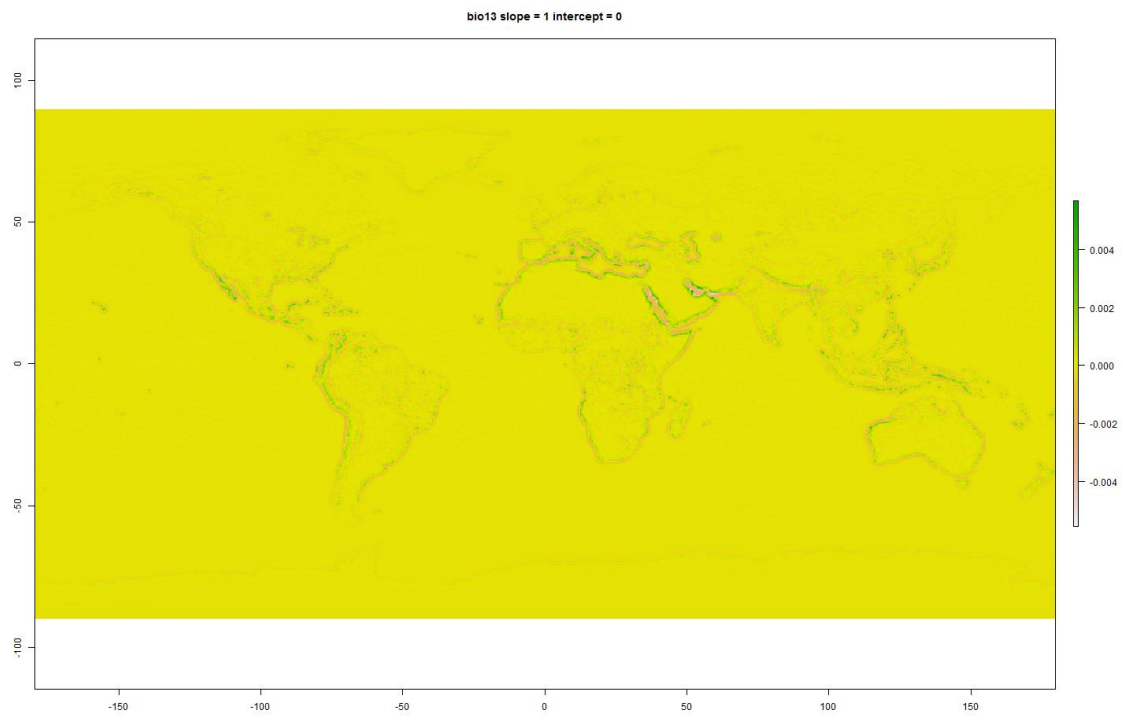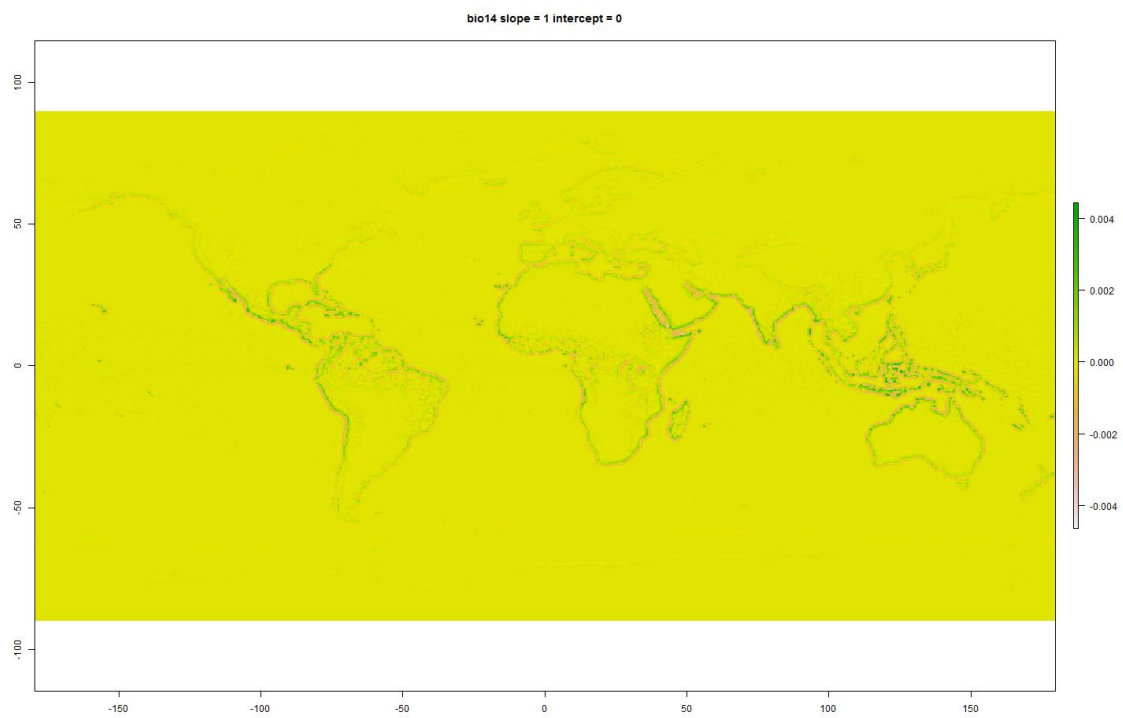



### Supplementary Figure 1 (cont.)

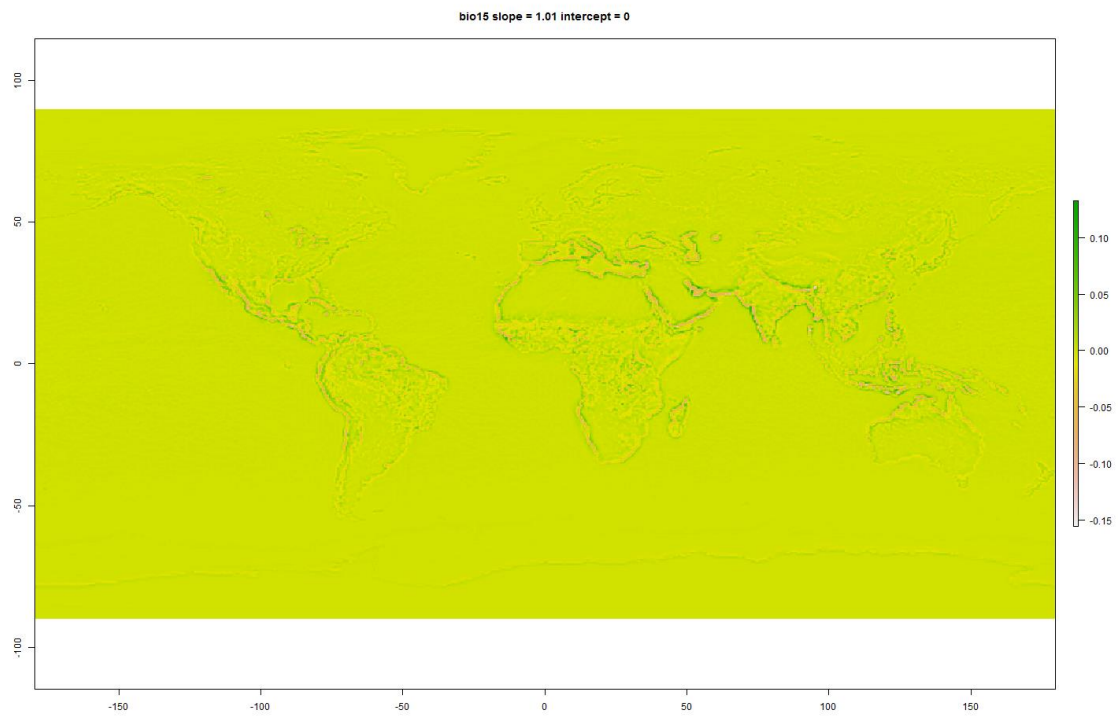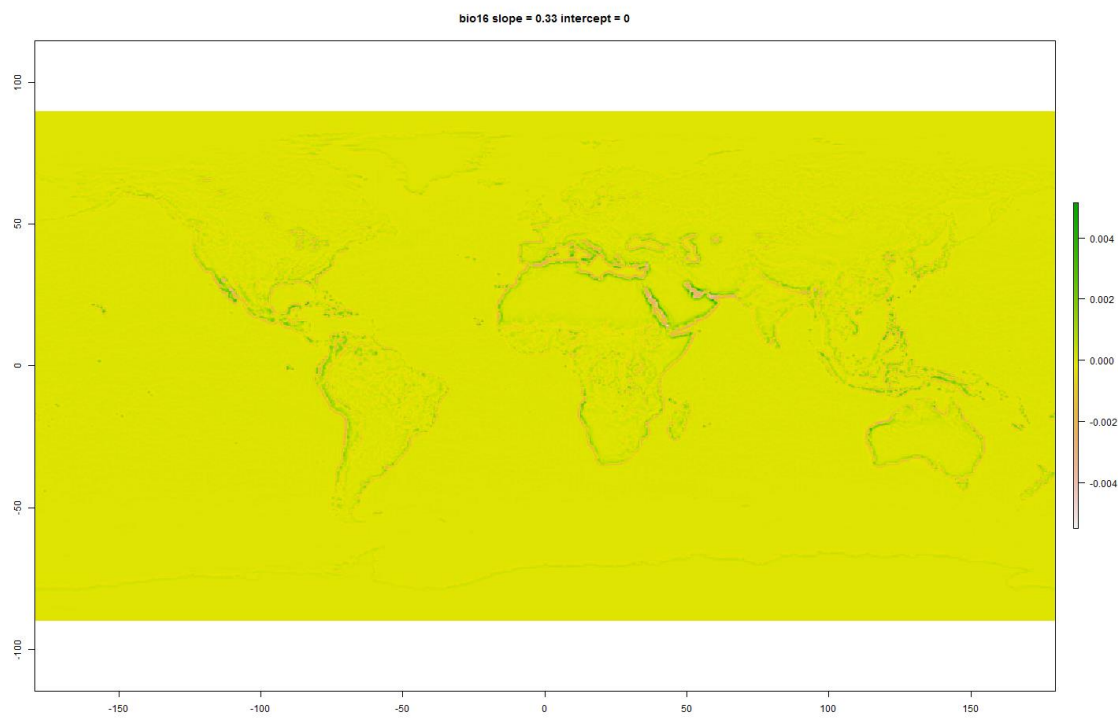

### Supplementary Figure 1 (cont.)

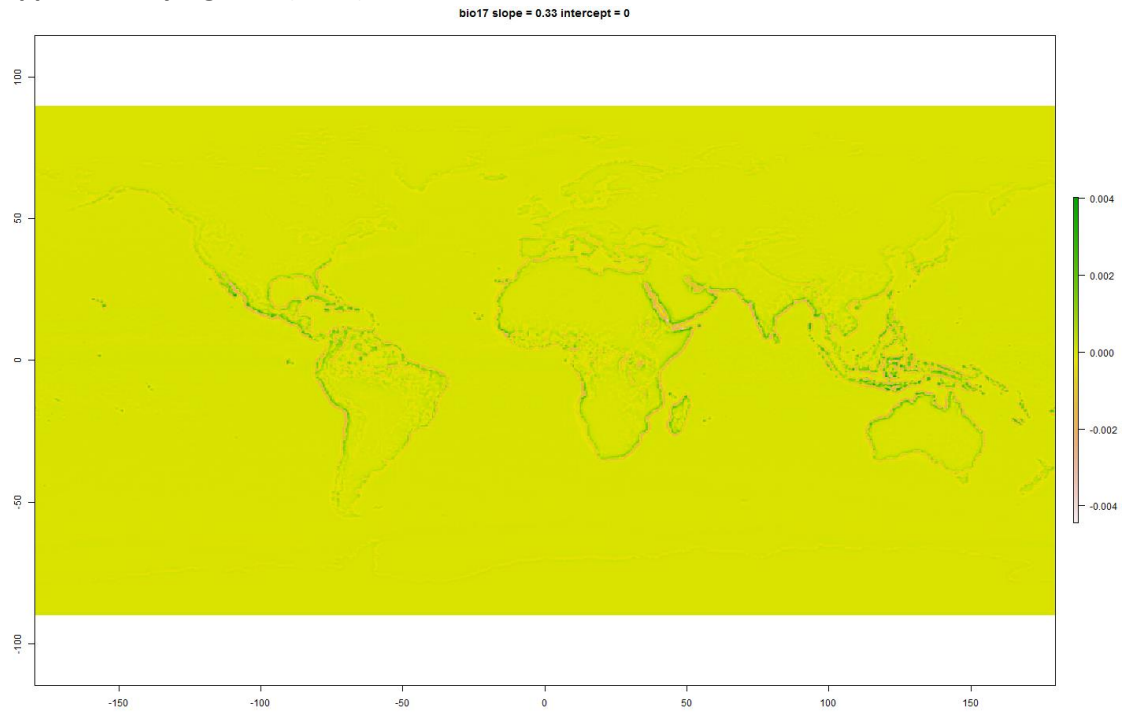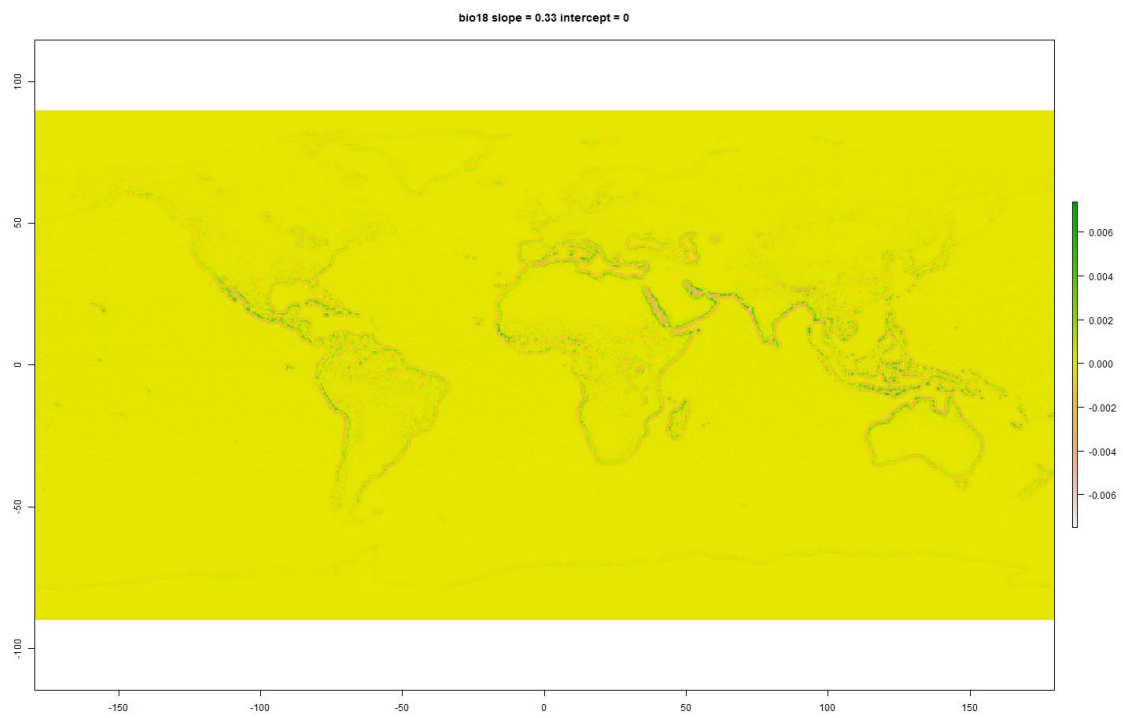

## Supplementary Figure 1 (cont.)

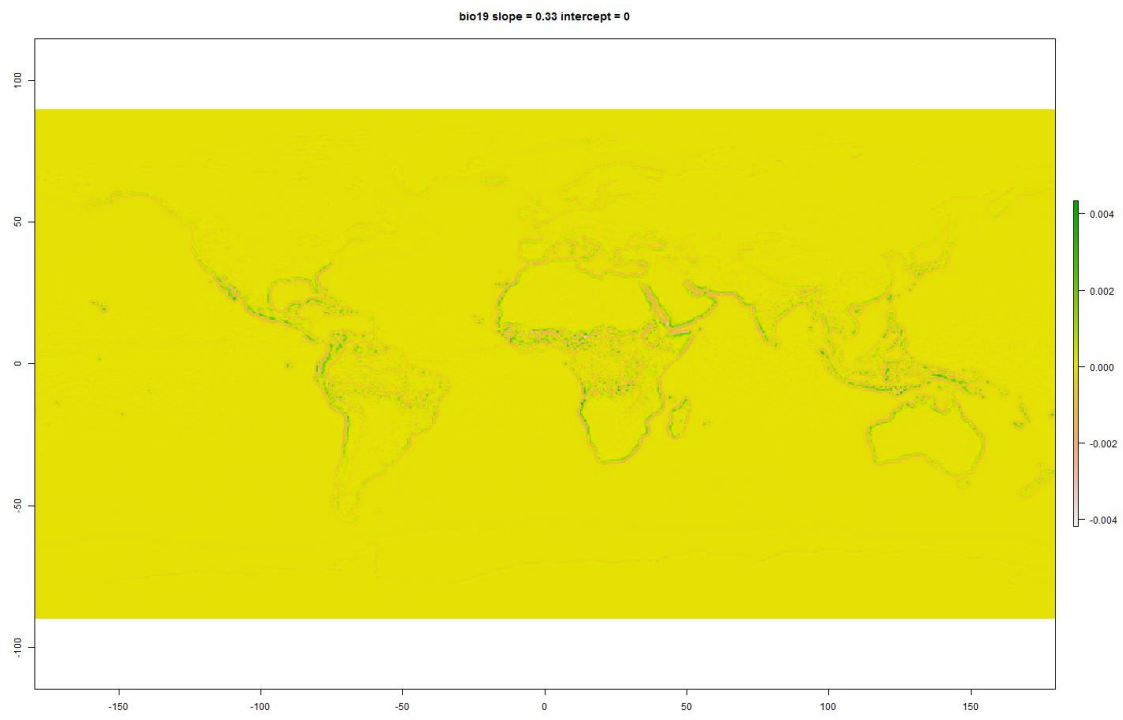

**Supplementary Figure 2:** Geographical location of absolute difference between MERRAclim and WorldClim for BIO5 and BIO6.

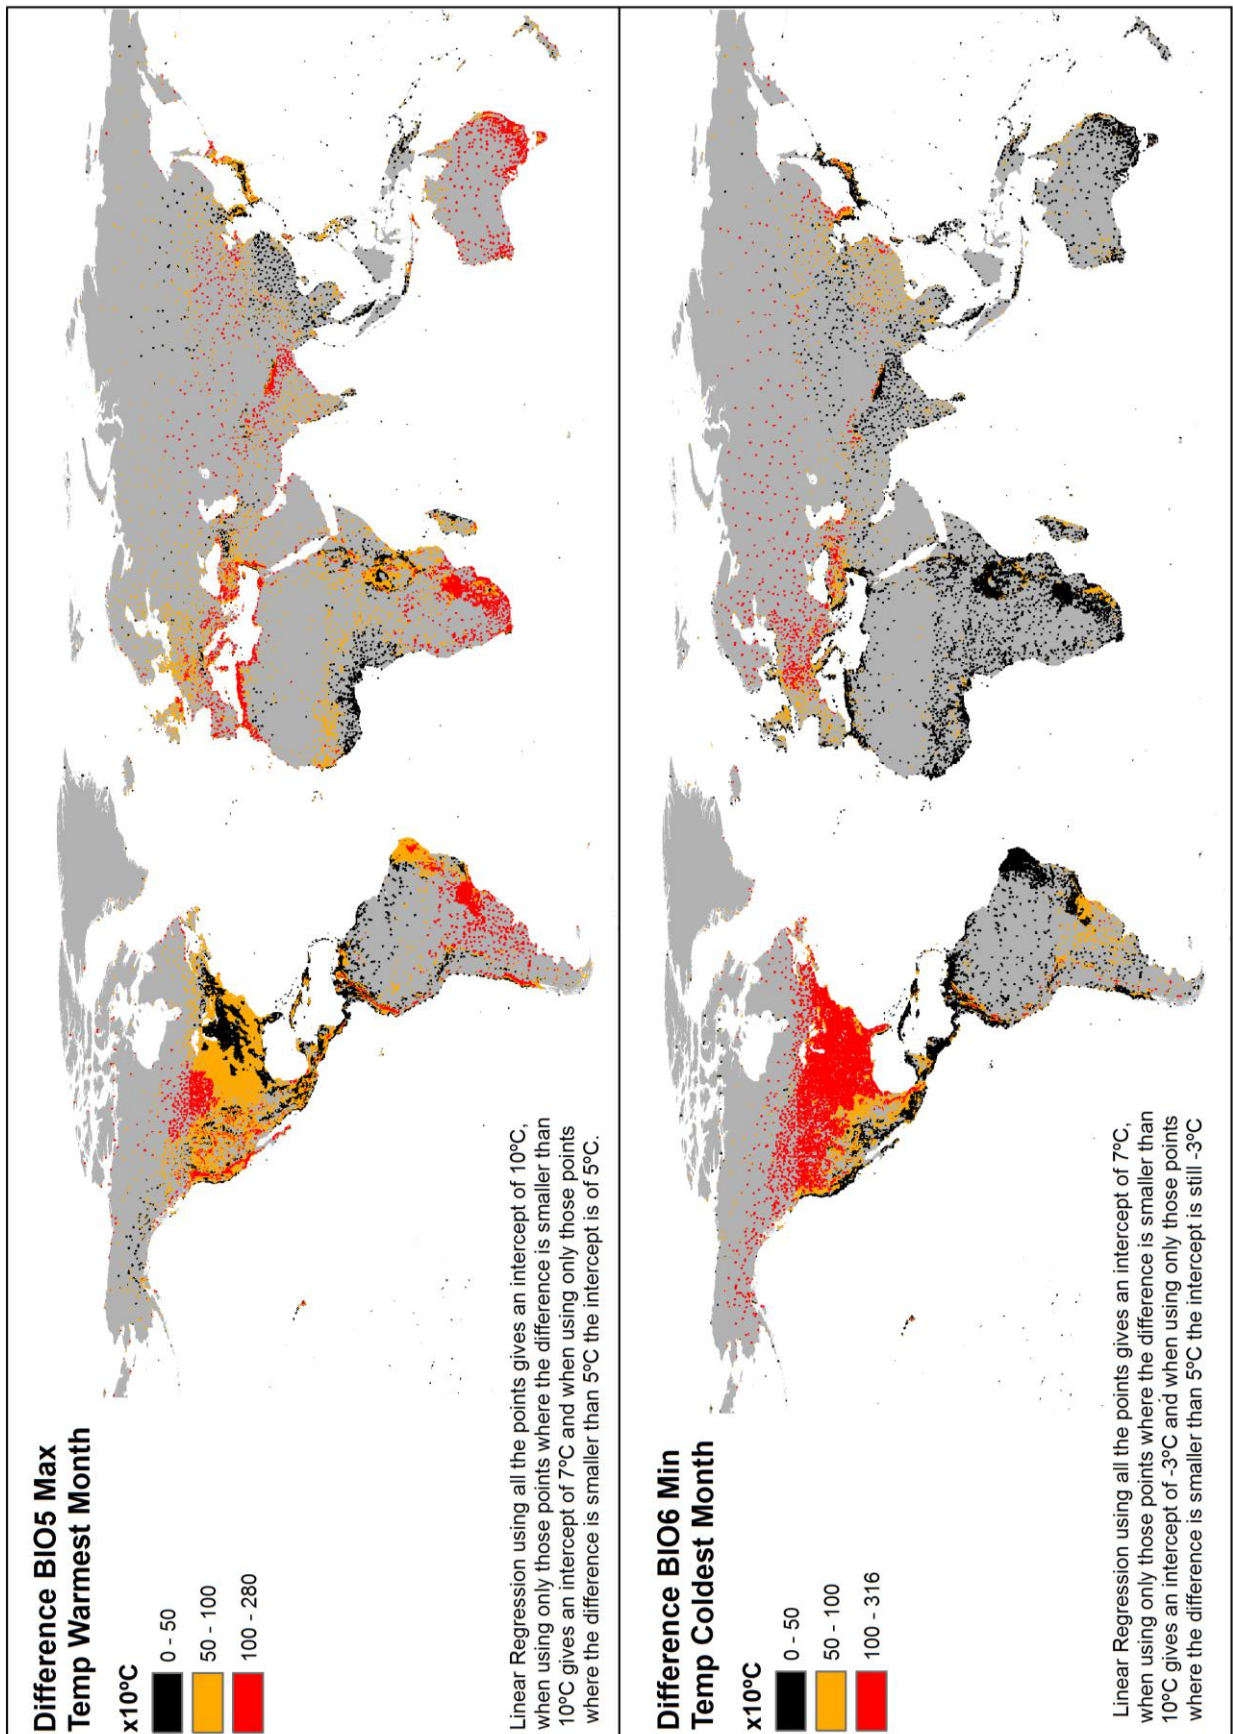



**Supplementary Figure 3:** Geographical location of residual outliers (red areas) from the comparison of MERRAclim vs WorldClim for each temperature – related bioclimatic variable. Black areas represent the area of comparison.

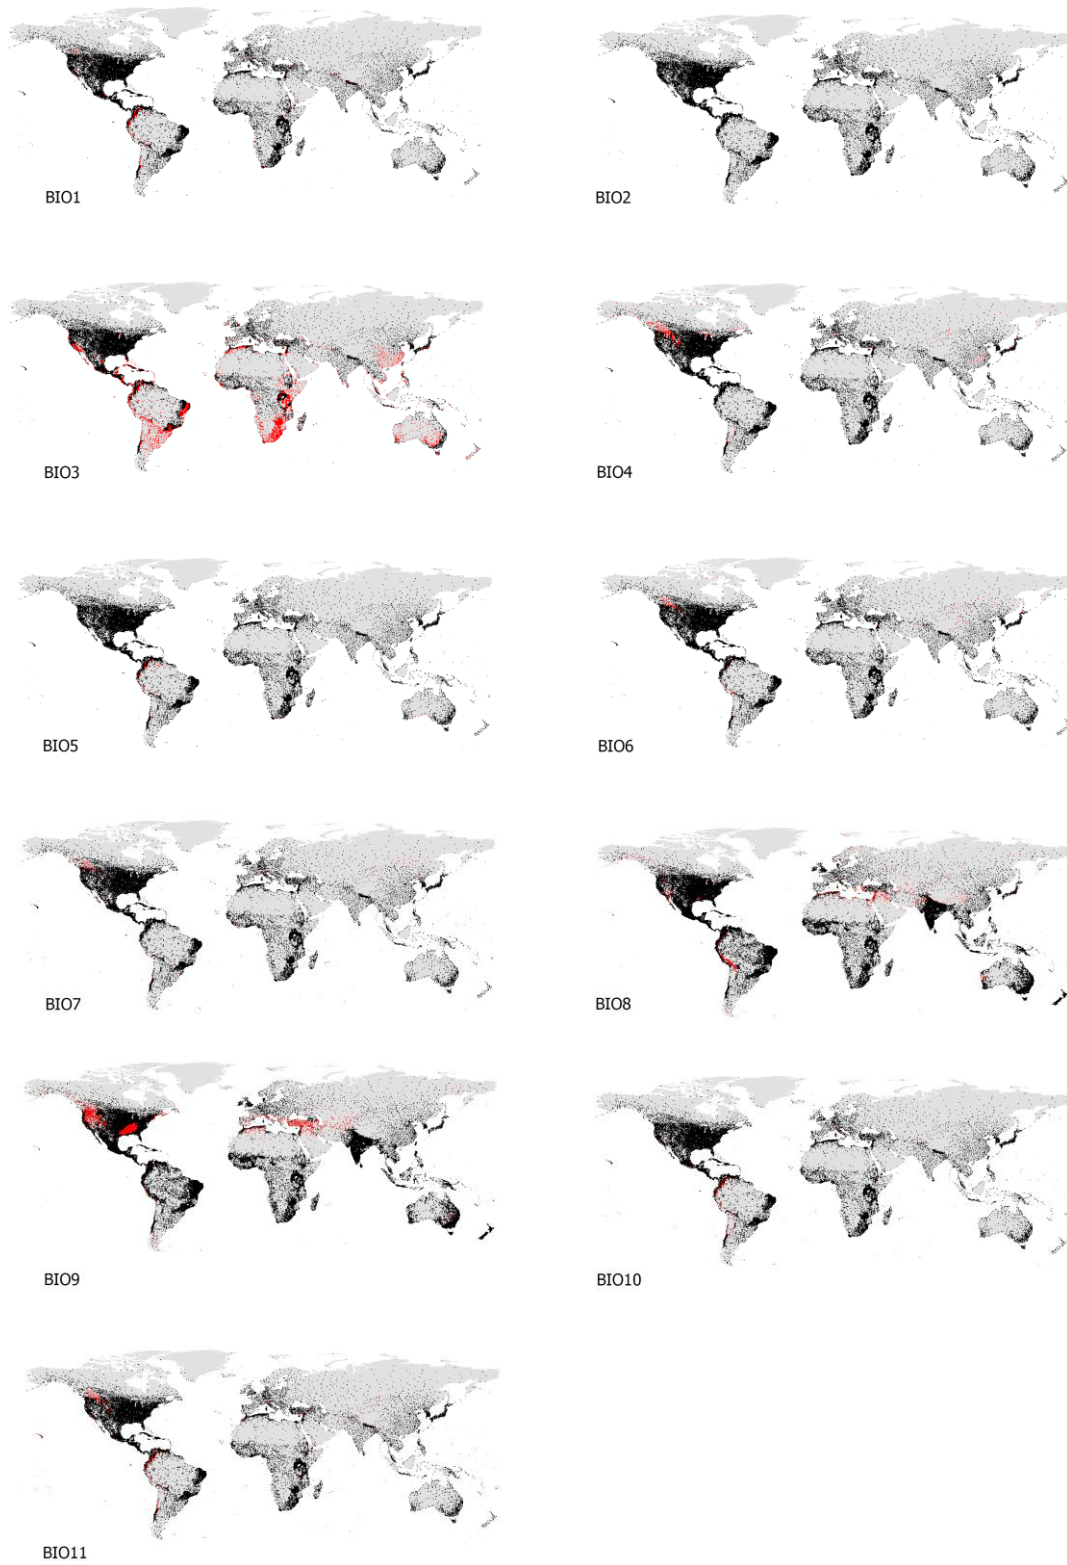

**Supplementary Figure 4:** Geographical location of residual outliers (red areas) from the comparison of MERRAclim vs WorldClim for each water – related bioclimatic variable. Black areas represent the area of comparison.

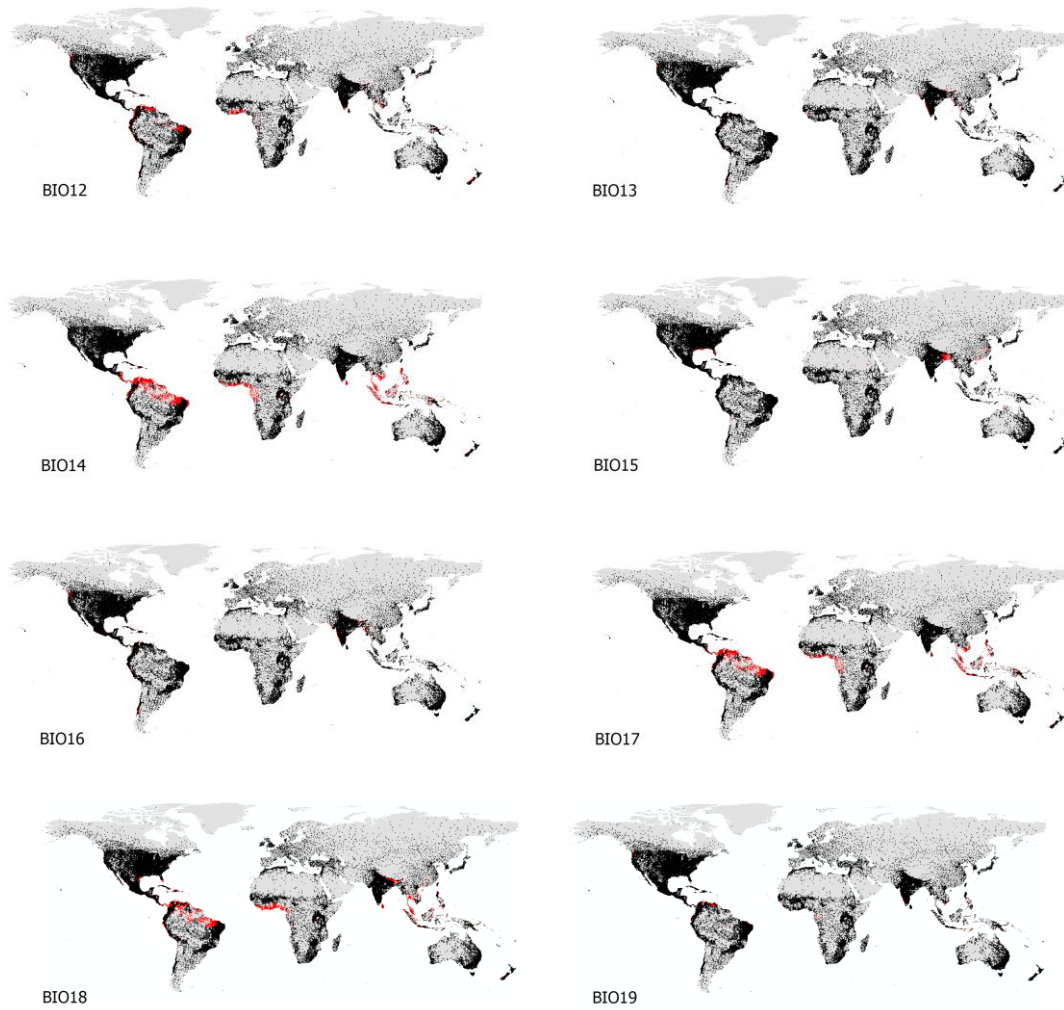



**Supplementary Figure 5:** Geographical location of bias for linear regressions from the comparison of MERRAclim vs WorldClim for all the only-temperature bioclimatic variables.

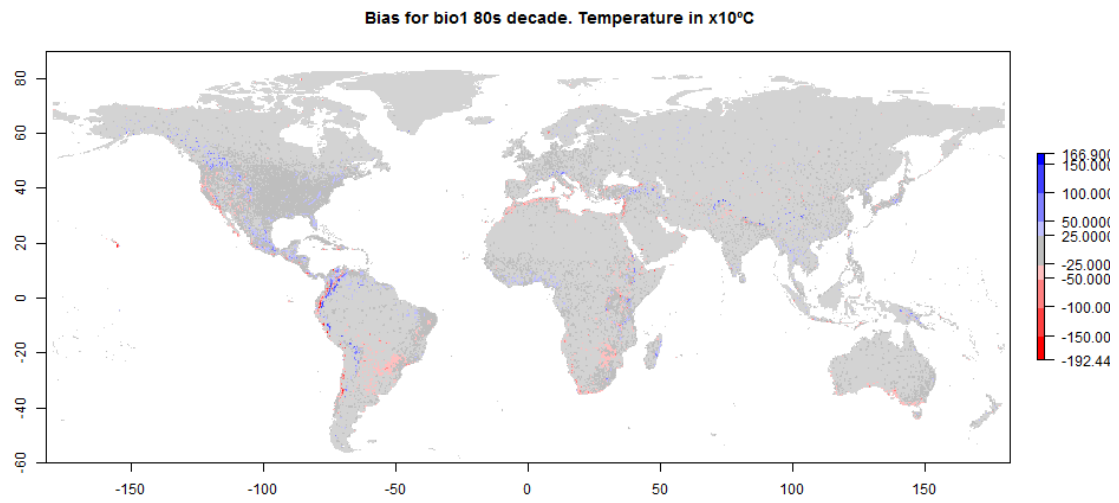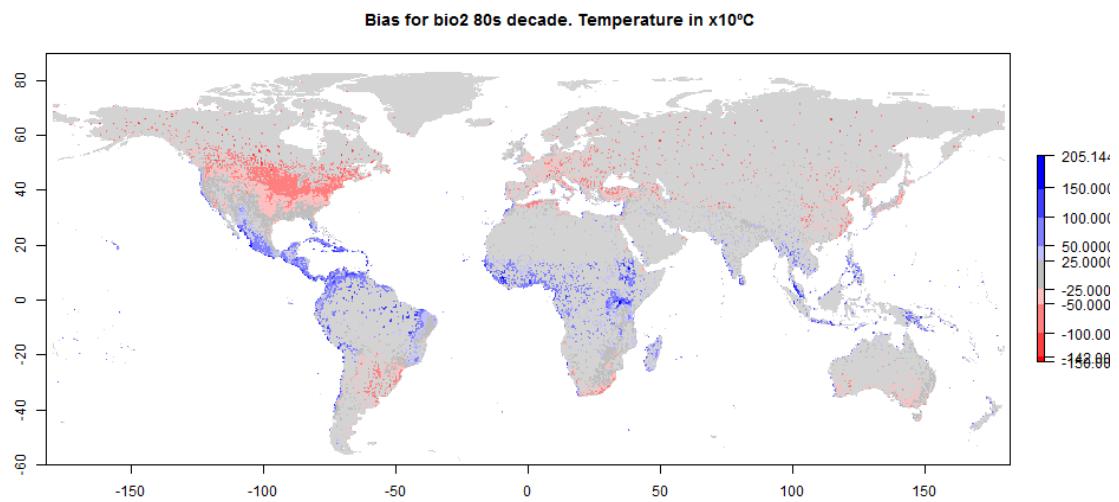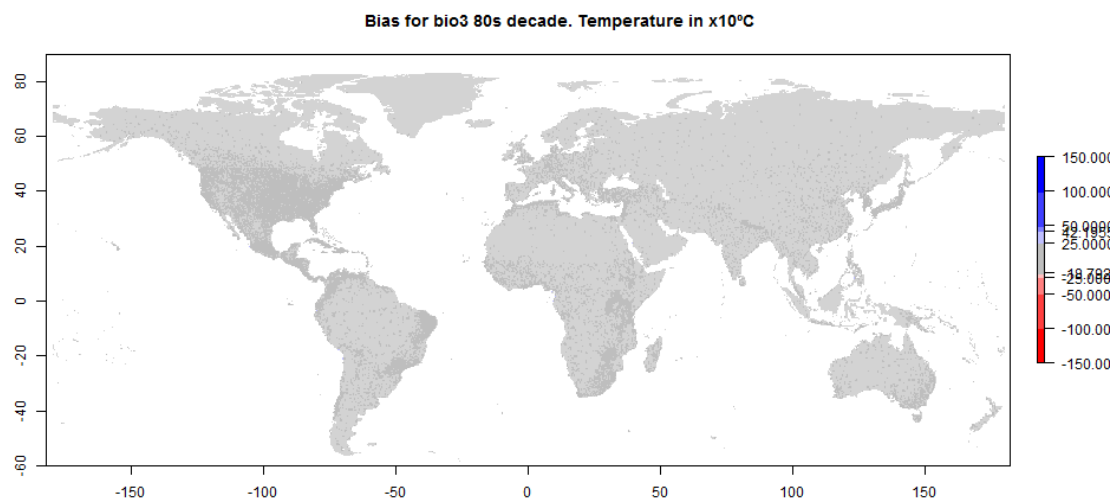

Supplementary Figure 5 (cont.)

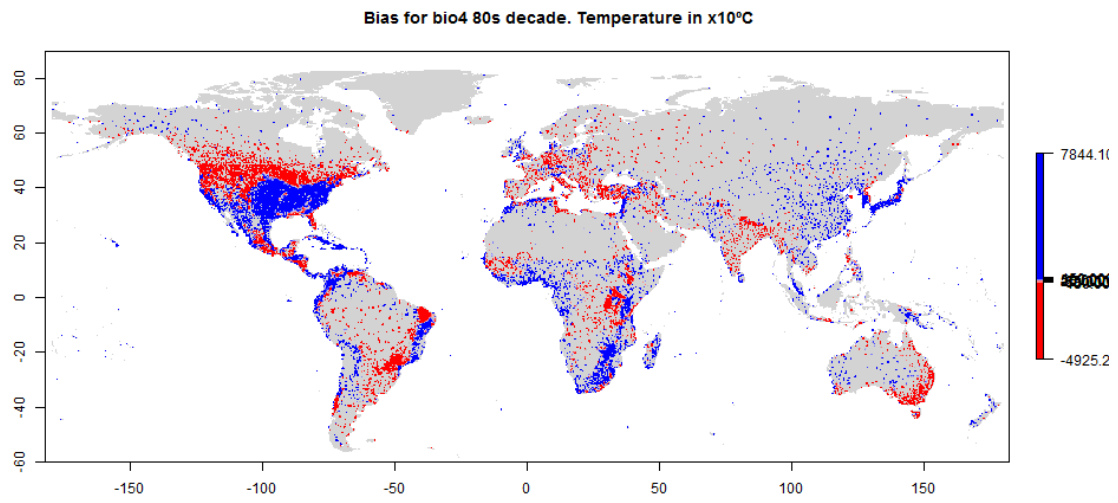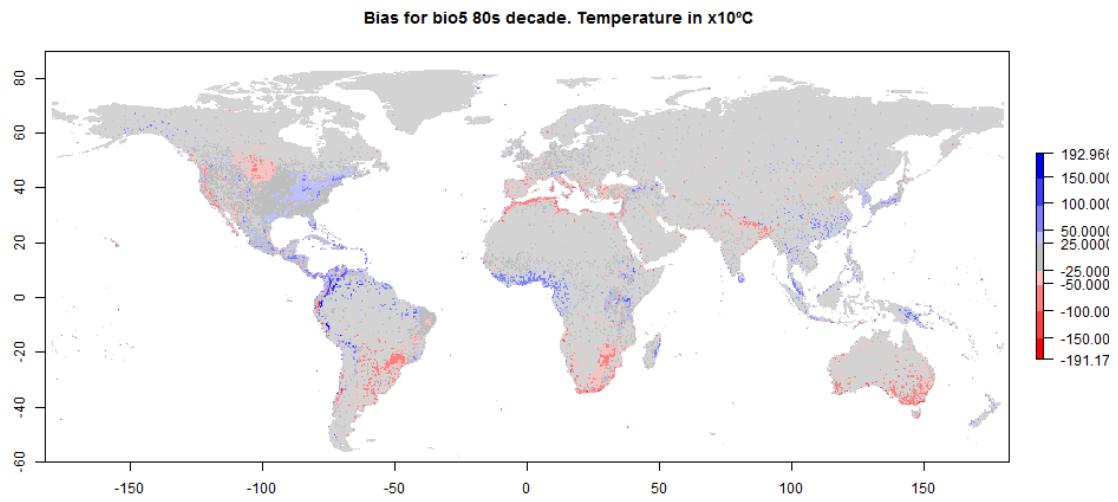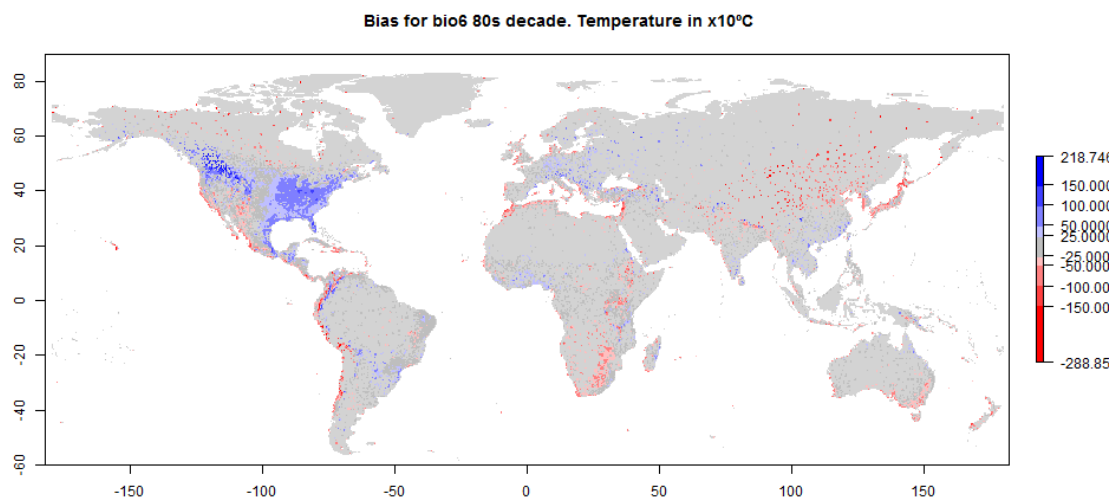

Supplementary Figure 5 (cont.)

Bias for bio7 80s decade. Temperature in x10°C

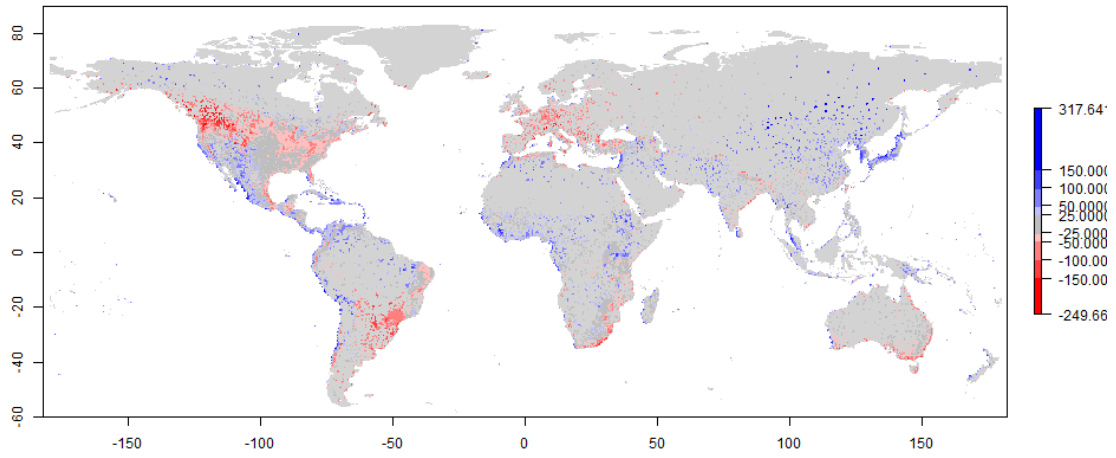

Bias for bio10 80s decade. Temperature in x10°C

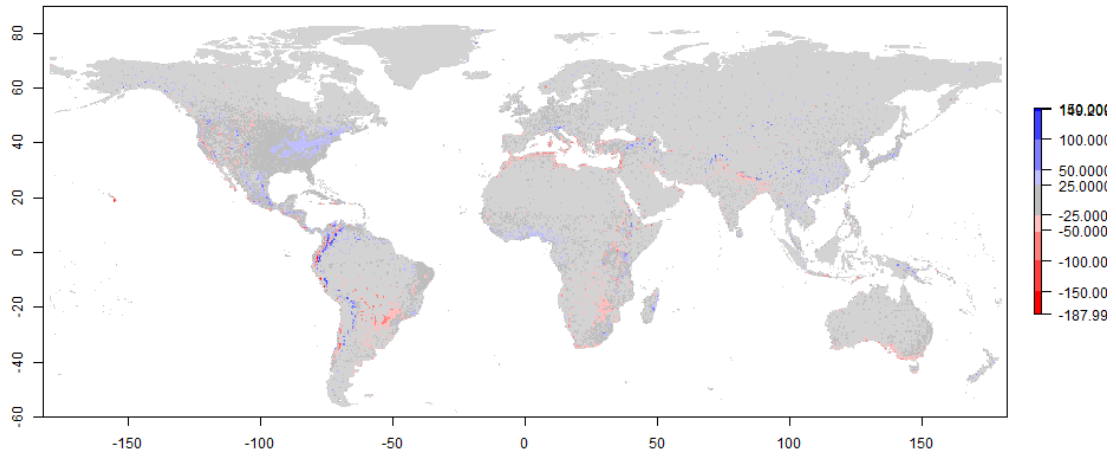

Bias for bio11 80s decade. Temperature in x10°C

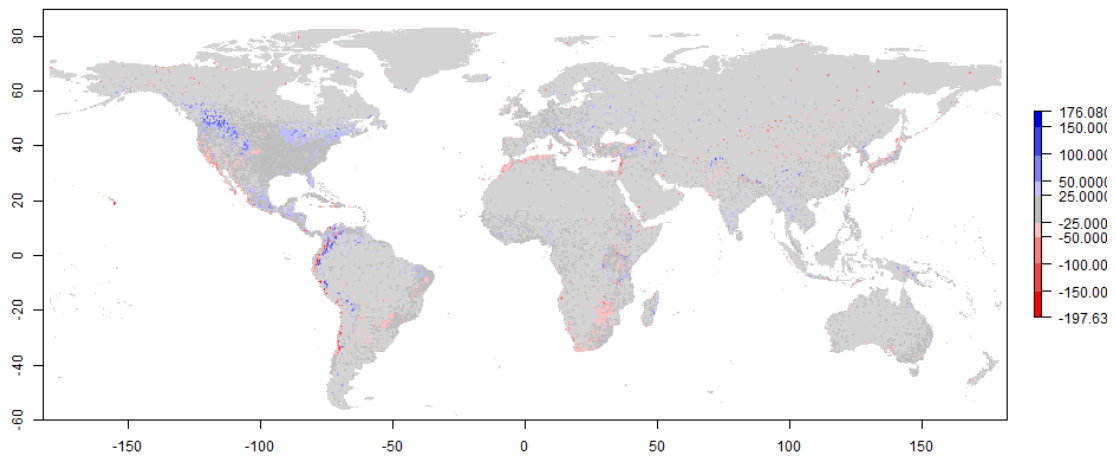

Supplementary Figure 5 (cont.)

Bias for bio1 90s decade. Temperature in x10°C

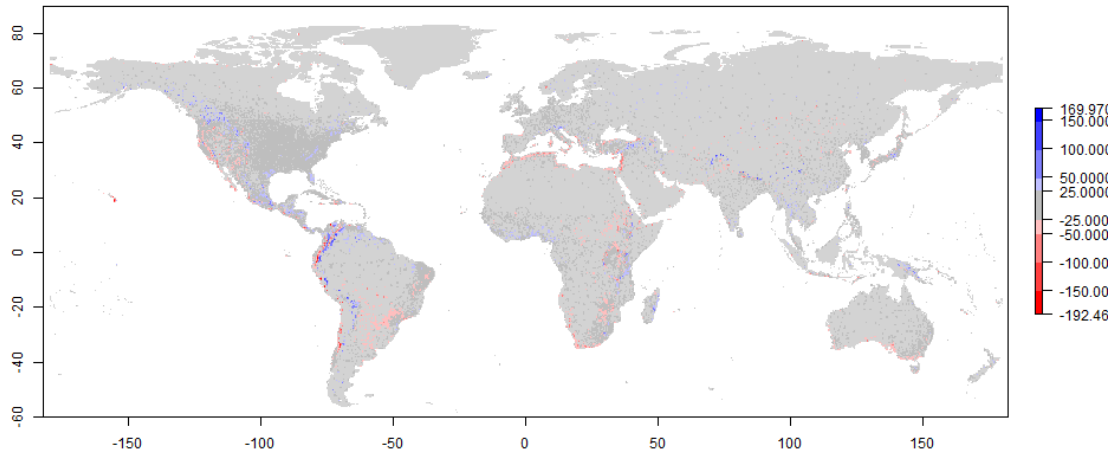

Bias for bio2 90s decade. Temperature in x10°C

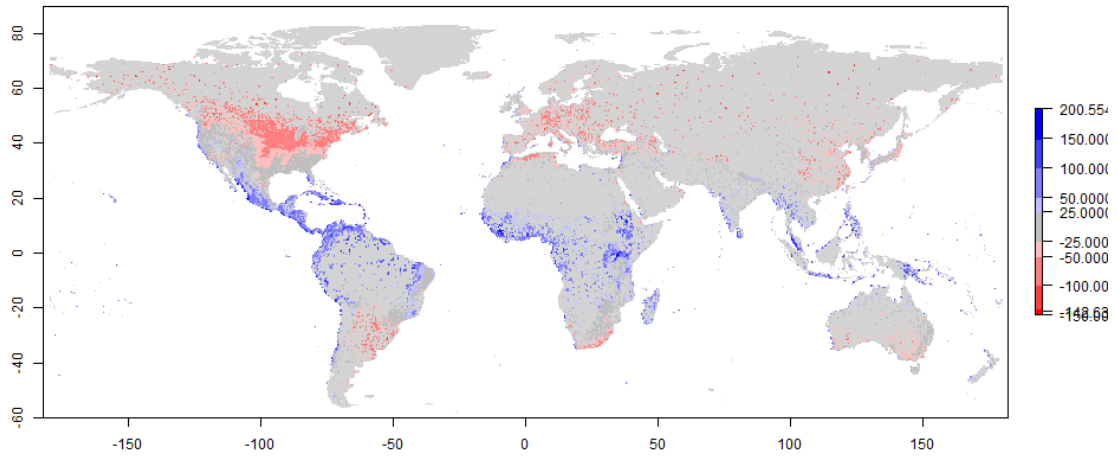

Bias for bio3 90s decade. Temperature in x10°C

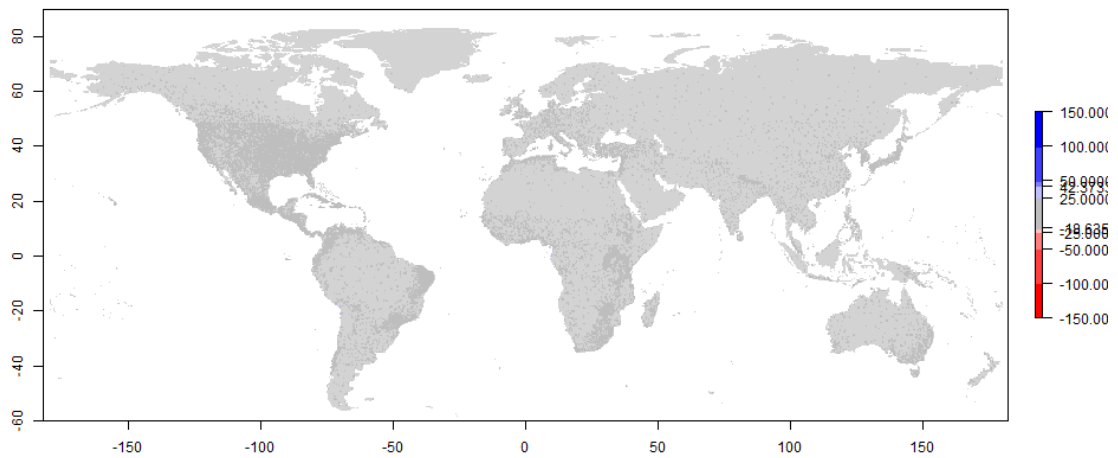

Supplementary Figure 5 (cont.)

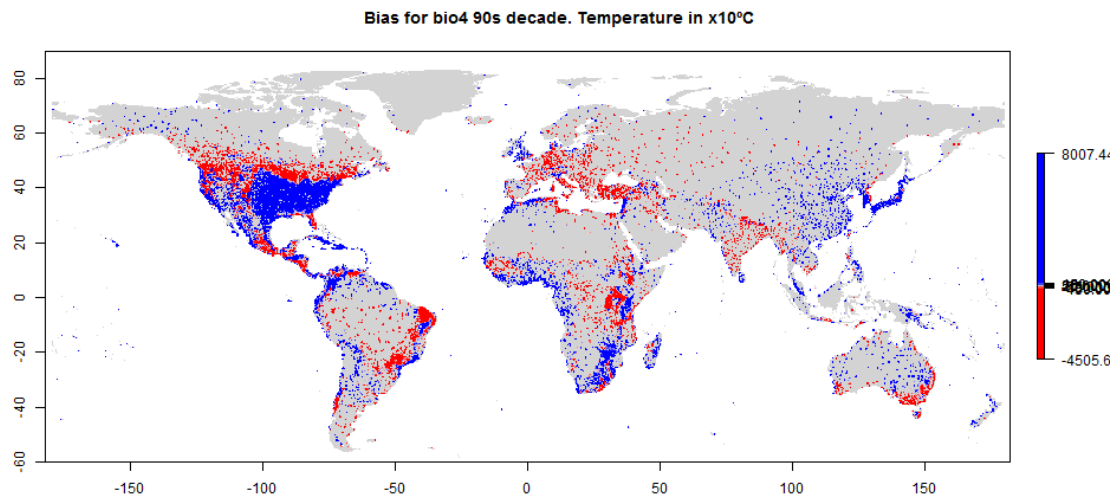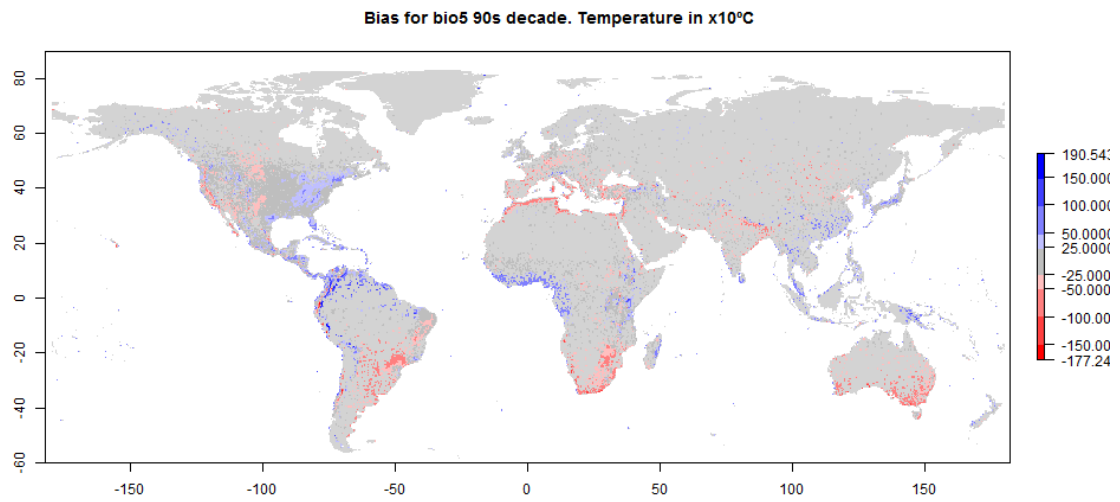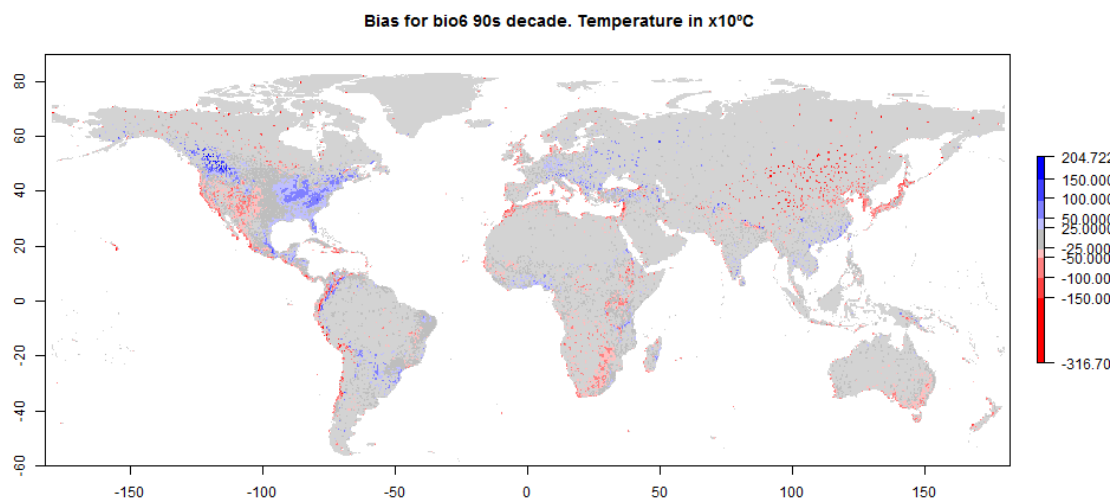

Supplementary Figure 5 (cont.)

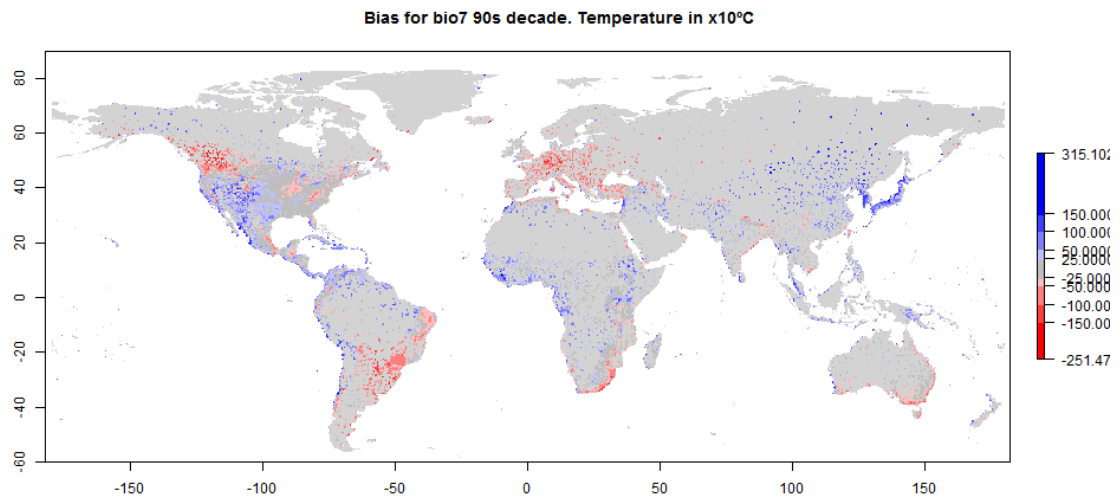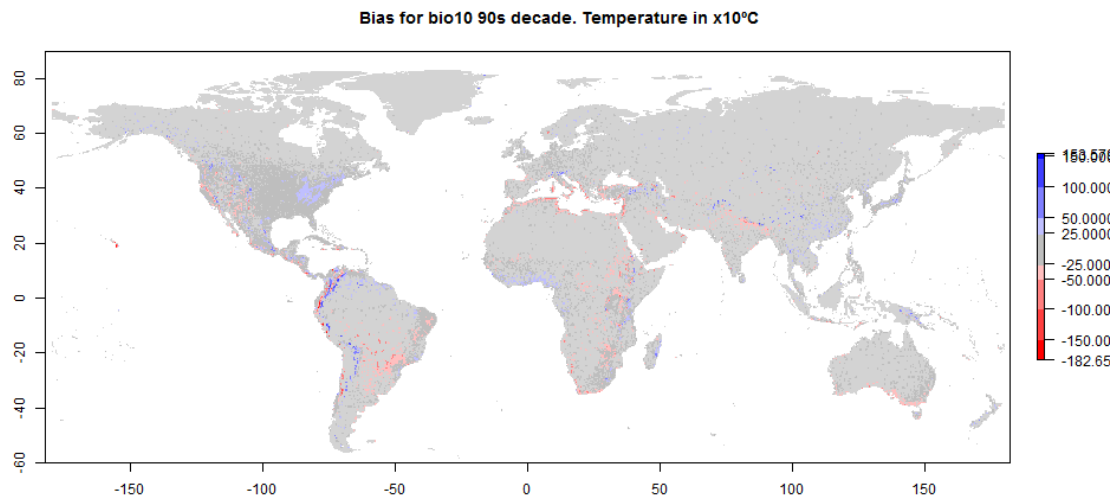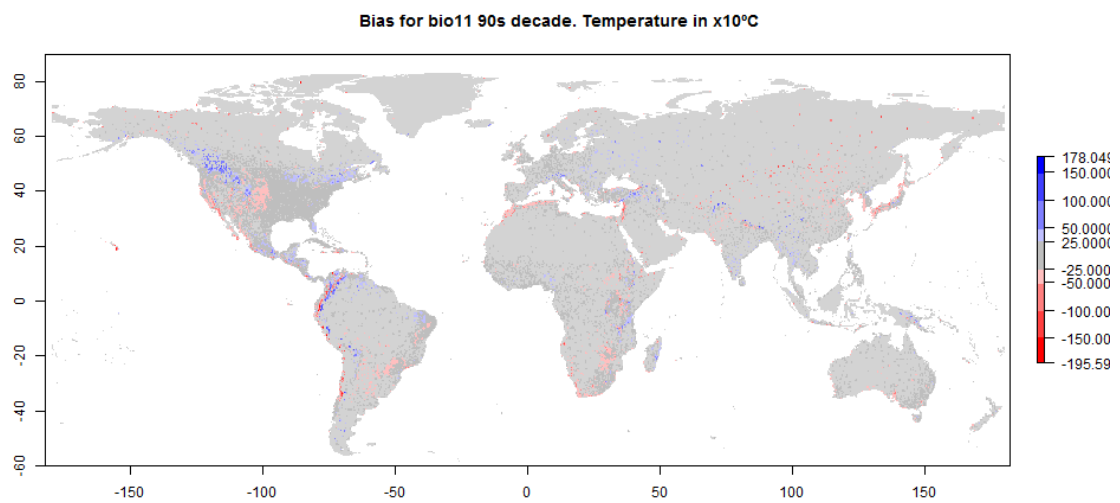

Supplement: sdata201778-s1.pdf [file sdata201778-s1.pdf]
